# Supplementary material for: Identifying Psychosocial Interventions That Improve Both Physical and Mental Health in Patients With Diabetes: A systematic review and meta-analysis
Source: PubMed Central journal article supplement — Diabetes Care. 2010 Apr;33(4):926–30. doi: 10.2337/dc09-1519 (PMC2845054; doi:10.2337/dc09-1519), 2010-04
Supplement: supp_dc09-1519_dc09-1519_Online_appendix.pdf [file supp_dc09-1519_dc09-1519_Online_appendix.pdf]

## Online Appendix 1 Search strategy

CENTRAL search (2007, updated 2009)

- 1 MeSH descriptor Diabetes Mellitus explode all trees
- 2 (diabet\*):ti,ab,kw in Clinical Trials
- 3 (1 OR 2)
- 4 "Diabetic Coma":kw in Clinical Trials
- 5 "Diabetic Foot":kw
- 6 "Diabetic Hypertension":kw
- 7 "Diabetic Ketoacidosis":kw
- 8 "Diabetic Macular Edema":kw
- 9 "Diabetic Nephropathy":kw
- 10 "Diabetic Neuropathy":kw
- 11 "Diabetic Obesity":kw
- 12 "Diabetic Retinopathy":kw
- 13 "Impaired Glucose Tolerance":kw
- 14 "Insulin Dependent Diabetes Mellitus":kw
- 15 "Juvenile Diabetes Mellitus":kw
- 16 "Non Insulin Dependent Diabetes Mellitus":kw
- 17 (4 OR 5 OR 6 OR 7 OR 8 OR 9 OR 10 OR 11 OR 12 OR 13 OR 14 OR 15 OR 16)
- 18 (3 OR 17)

Embase search for recent studies not included in CENTRAL (2006 – 2009)

1. exp Diabetes Mellitus/
2. randomized controlled trial/
3. crossover procedure/
4. double blind procedure/
5. single blind procedure/
6. or/2-5
7. 1 and 6
8. limit 7 to human
9. limit 8 to yr="2006 - 2007"

Medline search for recent studies not included in CENTRAL (2006 – 2009)

1. exp Diabetes Mellitus/
2. randomized controlled trial.pt.
3. controlled clinical trial.pt.
4. 2 or 3
5. 1 and 4
6. limit 5 to humans
7. limit 6 to yr="2006 - 2007"

Psychinfo search (1985 to 2009)

1. exp Diabetes/
2. Diabetes.tw.
3. or/1-2

4. Randomi?ed controlled trial\$.tw.
5. Controlled clinical trial\$.tw.
6. "2000".md.
7. or/4-6
8. (animal not human).po.
9. 7 not 8
10. (clin\$ adj25 trial\$).tw.
11. ((singl\$ or doubl\$ or trebl\$ or tripl\$) adj25 (blind\$ or mask\$)).tw.
12. placebo\$.tw.
13. random\$.tw.
14. or/10-13
15. 14 not 8
16. 15 not 9
17. 3 and (9 or 16)

Cinahl search (1980 – 2009)

1. Diabetes.hw.
2. Glycemic Control/
3. Diabetes.tw.
4. or/1-3
5. exp Clinical Trials/
6. Clinical Trial.pt.
7. Randomi?ed controlled trial\$.tw.
8. Controlled clinical trial\$.tw.
9. or/5-8
10. Random assignment/
11. Random\$.tw.
12. (clin\$ adj25 trial\$).ti,ab.
13. ((singl\$ or doubl\$ or trebl\$ or tripl\$) adj25 (blind\$ or mask\$)).ti,ab.
14. Placebos.sh.
15. placebo\$.tw.
16. or/10-15
17. 16 not 9
18. 4 and (9 or 17)

## Online Appendix Figure 1 PRISMA flowchart

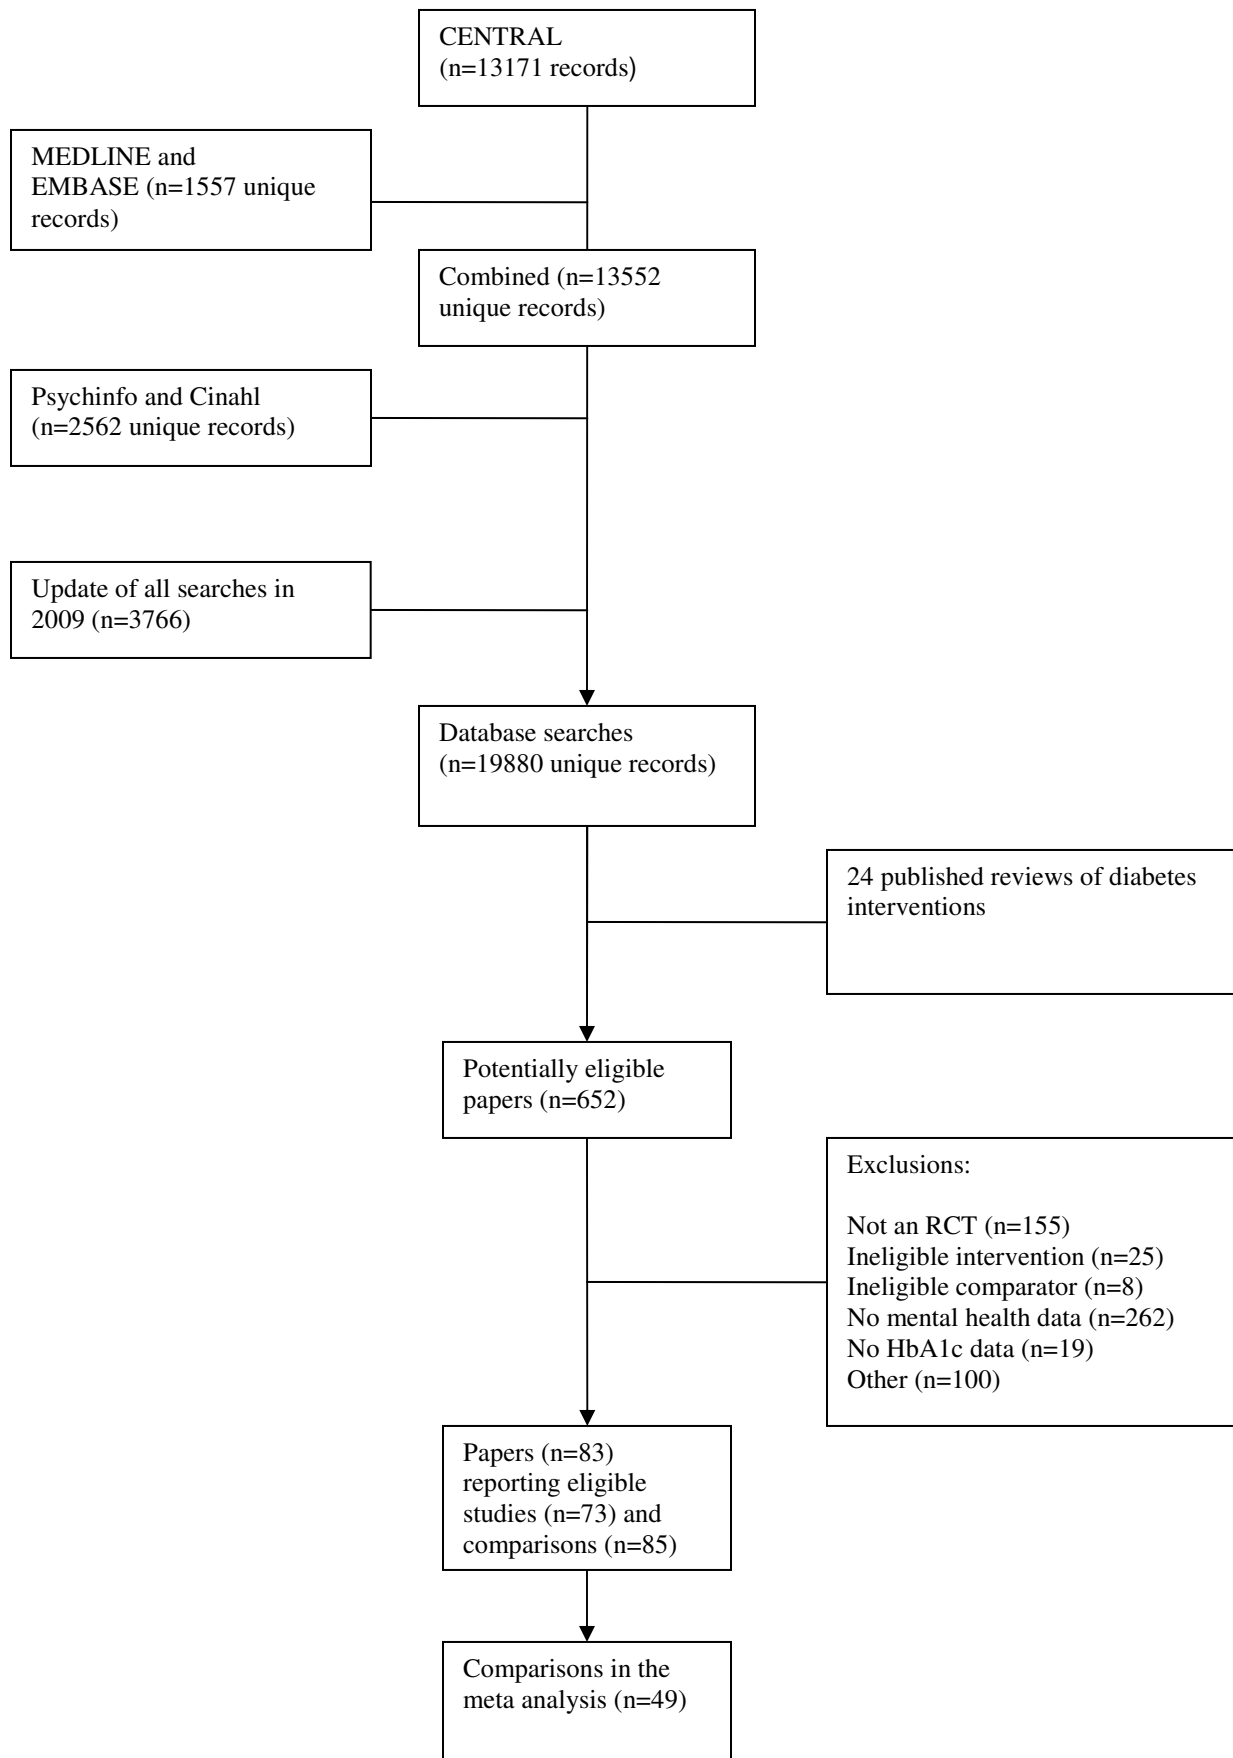

**Online Appendix Table 1 Descriptive data on populations, interventions and quality**

| Characteristic                            | Subcategories                                 | N (%) or Mean (SD)(range) |
|-------------------------------------------|-----------------------------------------------|---------------------------|
| Type of diabetes                          | Type 1                                        | 13 (27)                   |
|                                           | Type 2                                        | 27 (55)                   |
|                                           | Combined                                      | 9 (18)                    |
| Age                                       | Mean age <18                                  | 3 (6)                     |
|                                           | Mean age >50                                  | 31 (63)                   |
|                                           | Mixed                                         | 13 (27)                   |
|                                           | Unclear                                       | 2 (4)                     |
| Diabetic control                          | Recruited on the basis of poor control        | 11 (22)                   |
| Mental health                             | Recruited on the basis of baseline depression | 5 (10)                    |
| Professional delivering the intervention* | Mental health                                 | 13 (27)                   |
|                                           | Behaviour change                              | 14 (29)                   |
|                                           | Diabetes specialist                           | 11 (22)                   |
|                                           | Peers with diabetes                           | 5 (10)                    |
| Setting of delivery**                     | Community                                     | 10 (20)                   |
|                                           | Primary care                                  | 13 (27)                   |
|                                           | Specialist                                    | 27 (55)                   |
|                                           | Not clear                                     | 3 (6)                     |
| Delivery                                  | Face to face individual                       | 14 (29)                   |
|                                           | Face to face group                            | 15 (31)                   |
|                                           | Remote individual                             | 5 (10)                    |
|                                           | Remote group                                  | 0 (0)                     |
|                                           | Combination                                   | 15 (31)                   |
| Components                                |                                               | 1.9 (1.0) 1 to 5          |
| Number of sessions                        |                                               | 11.1 (9.2) 1 to 36        |
| Total time (hours)                        |                                               | 15.1 (20.4) 0.5 to 110    |

|                               |                                       |                       |
|-------------------------------|---------------------------------------|-----------------------|
| Duration of delivery (months) |                                       | 5.24 (5.2) 0.04 to 24 |
| Quality of delivery           | Training                              | 18 (37)               |
|                               | Supervision                           | 6 (12)                |
|                               | Use of a treatment manual             | 12 (24)               |
|                               | Assessments of adherence              | 8 (16)                |
|                               | Assessment of competence              | 6 (12)                |
| Lifestyle interventions       | Education and skills                  | 22 (45)               |
|                               | Exercise                              | 5 (10)                |
|                               | Theory based behavioural intervention | 16 (33)               |
|                               | Motivational interviewing             | 5 (10)                |
| Psychological interventions   | CBT                                   | 5 (10)                |
|                               | Social support and skills training    | 9 (18)                |
|                               | Relaxation                            | 8 (16)                |
|                               | Other psychological therapy           | 6 (12)                |
| Type of interventions         | Lifestyle only                        | 26 (53)               |
|                               | Psychological only                    | 14 (29)               |
|                               | Combined                              | 9 (18)                |
| Other                         | Health professional training          | 0 (0)                 |
|                               | Collaborative care                    | 5 (10)                |
|                               | Miscellaneous                         | 11 (22)               |
| Study quality                 | Adequate sequence generation          | 13 (27)               |
|                               | Adequate allocation concealment       | 11 (22)               |
|                               | Blinding of outcome assessors         | 14 (29)               |
|                               | Intention to treat analysis           | 19 (39)               |
|                               | Follow-up > 80%                       | 36 (73)               |
|                               | Sample size                           | 162 (183)<br>17-824   |

\*Some interventions used more than one type of professional (n=10), and some included none of the professionals listed

\*\*Percentages add up to more than 100% as some interventions took place in more than one setting (n=4)

**Online Appendix Table 2 Characteristics of the interventions**

| Author          | Intervention                                                | Sessions | Time (hours) | Duration (months) | Professionals involved in delivery | Lifestyle                          | Psychological             | Other         | Delivery mode           | Quality assurance                    |
|-----------------|-------------------------------------------------------------|----------|--------------|-------------------|------------------------------------|------------------------------------|---------------------------|---------------|-------------------------|--------------------------------------|
| Aikens 1997 (1) | Relaxation training                                         | 6.00     | 6            | 1.50              | Mental health Behaviour change     | None                               | Social support Relaxation | None          | Group face to face      | Manual                               |
| Alam 2004 (2)   | Supervised exercise program and supervision                 | 24.00    | 24           | 6                 | Behaviour change                   | Exercise Motivational interviewing | None                      | None          | Individual face to face | None                                 |
| Bing 2005 (3)   | Diabetes education and psychological intervention           | 24.00    | 48           | 6                 |                                    | Education and skills               | None                      | None          | Combined                | None                                 |
| Bond 2007 (4)   | Web-based education and skills and social support           | 26.00    | 6.5          | 6                 |                                    | Education and skills TBBI          | Social support            | None          | Combined                | None                                 |
| DAFNE 2002 (5)  | Skills training                                             | 5.00     | 35           | 0.18              | Diabetes specialist                | Education and skills               | None                      | None          | Group face to face      | Training Manual Adherence Competence |
| Davies 2008 (6) | Group education and skills training and goal setting        | 1.50     | 6            | 0.04              | Behaviour change                   | Education and skills TBBI          | None                      | None          | Group face to face      | Training Manual Adherence            |
| De Wit (7)      | Monitoring and discussion of health-related quality of life | 3.00     | 3            | 12                |                                    | None                               | Other psychotherapy       | Miscellaneous | Individual face to face | Training Manual                      |



|                     |                                                |       |       |      |                                                                  |                                                           |                     |                    |                         |                              |
|---------------------|------------------------------------------------|-------|-------|------|------------------------------------------------------------------|-----------------------------------------------------------|---------------------|--------------------|-------------------------|------------------------------|
| Didjurgeit 2002 (8) | Problem-solving                                | 14.00 | 12.8  | 3.50 | Mental health                                                    | None                                                      | CBT                 | None               | Individual face to face | Supervision                  |
| George 2008 (9)     | Brief educational intervention                 | 3     | 19    | 1.5  | Diabetes specialist                                              | Education and skills<br>TBBI                              | None                | None               | Group face to face      | Training<br>Manual Adherence |
| Gilden 1992 (10)    | Education and support                          | 18.00 | 18    | 18   | Mental health<br>Peer                                            | Education and skills                                      | Social support      | None               | Group face to face      | Training                     |
| Glasgow 2006 (11)   | Theory based self management                   | 3.00  | 1.5   | 1    | Behaviour change                                                 | Education and skills<br>TBBI<br>Motivational interviewing | None                | Collaborative care | Combined                | Training                     |
| Graue 2005 (12)     | Education and counselling                      | 6.00  | 11.25 | 12   | Mental health<br>Behaviour change<br>Diabetes specialist<br>Peer | Education and skills<br>TBBI<br>Motivational interviewing | Social support      | None               | Combined                | None                         |
| Grey 1998 (13)      | Coping skills training                         | 12.00 | 15    | 7.50 | Mental health<br>Diabetes specialist                             | TBBI                                                      | Social support      | None               | Group face to face      | Training<br>Adherence        |
| Henry 1997 (14)     | Cognitive-behavioural stress management        | 6.00  | 9     | 1.50 | Mental health<br>Behaviour change                                | None                                                      | CBT<br>Relaxation   | None               | Group face to face      | None                         |
| Huang 2002 (15)     | Health education and psychosocial intervention | 31.50 | 79.5  | 3    | Mental health<br>Diabetes specialist                             | Education and skills                                      | Other psychotherapy | None               | Combined                | None                         |

|                                          |                                           |       |      |      |                             |                                |                                       |                    |                         |                                                           |
|------------------------------------------|-------------------------------------------|-------|------|------|-----------------------------|--------------------------------|---------------------------------------|--------------------|-------------------------|-----------------------------------------------------------|
| Ismail 2008 MET (16)                     | Motivational Enhancement Therapy          | 4     | 3.33 | 2    | Diabetes specialist         | Motivational interviewing      | None                                  | None               | Individual face to face | Training<br>Supervision<br>Manual Adherence<br>Competence |
| Ismail 2008 MET+CBT (16)                 | Motivational Enhancement Therapy plus CBT | 4     | 3.33 | 2    | Diabetes specialist         | Motivational interviewing TBBI | None                                  | None               | Individual face to face | Training<br>Supervision<br>Manual Adherence<br>Competence |
| Jacobi 2002 mastery (17)                 | Mastery                                   | 6.00  | 6    | 1.50 | Behaviour change            | None                           | CBT                                   | Miscellaneous      | Group face to face      | Supervision<br>Competence                                 |
| Jacobi 2002 support (17)                 | Support                                   | 6.00  | 6    | 1.50 | Behaviour change            | None                           | Social support                        | None               | Group face to face      | Supervision<br>Competence                                 |
| Janssen 2009 (18)                        | Education                                 | 9.00  | 9    | 12   |                             | Education and skills           | None                                  | None               | Individual face to face | Training                                                  |
| Karlsen 2004 (19)                        | Group counselling                         | 9.00  | 13.5 | 12   | Diabetes specialist<br>Peer | Education and skills<br>TBBI   | Social support<br>Other psychotherapy | Miscellaneous      | Group face to face      | Training                                                  |
| Katon 2006 (20,21)                       | Case management                           | 10.93 | 6.53 | 12   | Mental health               | None                           | CBT                                   | Collaborative care | Combined                | Training<br>Supervision<br>Manual Adherence<br>Competence |
| Koehler 1981 progressive relaxation (22) | Progressive relaxation                    | 4.00  | 1    | 1    |                             | None                           | Relaxation                            | None               | Individual remote       | None                                                      |
| Koehler 1981 self-relaxation (22)        | Self relaxation                           | 4.00  | 1    | 1    |                             | None                           | Relaxation                            | None               | Individual remote       | None                                                      |
| Kulzer 2007 self management group (23)   | Self management group                     | 12.00 | 18   | 3    | Behaviour change            | TBBI                           | None                                  | None               | Group face to face      | Training                                                  |

|                                             |                                                |       |       |      |                                |                      |                                |                    |                         |                 |
|---------------------------------------------|------------------------------------------------|-------|-------|------|--------------------------------|----------------------|--------------------------------|--------------------|-------------------------|-----------------|
| Kulzer 2007 self management individual (23) | Self management individual                     | 12.00 | 18    | 3    | Behaviour change               | TBBI                 | None                           | None               | Combined                | Training        |
| Lambers 2008 combination (24)               | Strength & endurance training                  | 36    | 36    | 3    |                                | Exercise             | None                           | None               | Individual face to face | None            |
| Lambers 2008 exercise (24)                  | Exercise training                              | 36    | 36    | 3    |                                | Exercise             | None                           | None               | Individual face to face | None            |
| Ligtenberg 1998 (25)                        | Physical training programme                    | 21.00 | 18.75 | 3    |                                | Exercise             | None                           | None               | Combined                | None            |
| Litaker 2003 (26)                           | Self management training                       | 12.00 | 3     | 12   |                                | None                 | None                           | Collaborative care | Combined                | Training Manual |
| Lustman 1998 (27)                           | CBT                                            | 10.00 | 10    | 2.50 | Mental health Behaviour change | None                 | CBT                            | None               | Individual face to face | None            |
| Ma 2006 (28)                                | Psycho-intervention                            | 6     | 6     | 1.5  | Mental health                  | Education and skills | Relaxation Other psychotherapy | None               | Combined                | None            |
| Maljanian 2005 (29)                         | Telephone follow up                            | 12.00 | 1.40  | 3    |                                | Education and skills | None                           | None               | Individual remote       | Manual          |
| McGinnis 2005 (30)                          | Biofeedback and relaxation                     | 10    | 7.5   | 2.5  |                                | None                 | Relaxation                     | Miscellaneous      | Individual face to face | None            |
| McGrady 1999 (31)                           | Biofeedback and relaxation                     | 12.00 | 9     | 3    |                                | None                 | Relaxation                     | None               | Individual face to face | None            |
| O'Kane 2008 (32)                            | Self monitoring                                | 4     | 4     | 12   |                                | Education and skills | None                           | None               | Individual face to face | None            |
| Piette 2000 (33)                            | Automated calls with telephone nurse follow-up | 5.60  | 1.16  | 12   |                                | Education and skills | None                           | Miscellaneous      | Individual remote       | None            |

|                       |                                      |       |       |      |                                                          |                                  |                              |                    |                         |                 |
|-----------------------|--------------------------------------|-------|-------|------|----------------------------------------------------------|----------------------------------|------------------------------|--------------------|-------------------------|-----------------|
| Pouwer 2001 (34)      | Monitoring psychological well-being  | 2.00  | 0.50  | 6    | Diabetes specialist                                      | None                             | Other psychotherapy          | Miscellaneous      | Individual face to face | Training        |
| Robertson 2002 (35)   | Problem solving                      | 2.00  | 3.30  | 0.04 | Behaviour change                                         | Education and skills<br>TBBI     | None                         | None               | Group face to face      | None            |
| Rosal 2005 (36)       | Self-management                      | 13.00 | 29    | 2.50 | Diabetes specialist                                      | Education and skills<br>TBBI     | None                         | Miscellaneous      | Combined                | Training Manual |
| Rost 1991 (37)        | Activation and education             | 1.00  | 0.75  | 0.04 |                                                          | TBBI                             | None                         | Miscellaneous      | Combined                | None            |
| Scott 1984 (38)       | Diabetes education                   | 4.00  | 4     | 1    |                                                          | Education and skills             | None                         | None               | Combined                | None            |
| Siebolds 2006 (39)    | Monitoring and counselling           | 4.00  | 0.50  | 6    |                                                          | TBBI                             | None                         | Miscellaneous      | Individual face to face | Training Manual |
| Speiss 1995 (40)      | Education plus stress reduction      | 27.00 | 39.50 | 6    | Mental health                                            | None                             | Other psychotherapy          | Miscellaneous      | Combined                | None            |
| Sykes 2004 (41)       | Aerobic exercise training            | 14.00 | 14    | 3.50 |                                                          | Education and skills<br>Exercise | None                         | None               | Group face to face      | None            |
| Toobert 2007 (42)     | Mediterranean lifestyle program      | 27.00 | 110   | 6    | Mental health<br>Behaviour change<br>Peer                | Education and skills<br>TBBI     | Social support<br>Relaxation | Miscellaneous      | Group face to face      | None            |
| van der Ven 2005 (43) | Cognitive Behavioural Group Training | 6.00  | 12    | 1.50 | Mental health<br>Behaviour change<br>Diabetes specialist | TBBI                             | None                         | None               | Group face to face      | Adherence       |
| Wagner 2001 (44)      | Chronic care clinics                 | 5.30  | 9.28  | 24   | Peer                                                     | Education and skills             | Social support               | Collaborative care | Combined                | None            |

|                      |                                          |       |   |    |  |                      |      |                    |                   |      |
|----------------------|------------------------------------------|-------|---|----|--|----------------------|------|--------------------|-------------------|------|
| Weinburger 1995 (45) | Nurse education and telephone monitoring | 12.00 | 3 | 12 |  | Education and skills | None | Collaborative care | Individual remote | None |
|----------------------|------------------------------------------|-------|---|----|--|----------------------|------|--------------------|-------------------|------|

TBBI: Theory based behavioural intervention

CBT: Cognitive-behavioural therapy

### Online Appendix Table 3 Quality of the studies

| Author          | Follow up duration | N   | Sample characteristics                          | Context    | Sequence generation adequate? | Concealment adequate? | Outcomes blinded? | Intention to treat analysis? | Attrition <20 % | Mental health outcome                                      |
|-----------------|--------------------|-----|-------------------------------------------------|------------|-------------------------------|-----------------------|-------------------|------------------------------|-----------------|------------------------------------------------------------|
| Aikens 1997 (1) | 16 weeks           | 22  | Elderly<br>59% female<br>Type 2<br>Poor control | Specialist | No                            | No                    | No                | No                           | Yes             | Symptom Check List (SCL 90) generalized distress scale     |
| Alam 2004 (2)   | 6 months           | 18  | Elderly<br>50% female<br>Type 2<br>Poor control | Specialist | No                            | No                    | No                | No                           | Yes             | Well being questionnaire (WBQ) total score                 |
| Bing 2005 (3)   | 6 months           | 300 | Elderly<br>38% female<br>Type 2                 | Specialist | No                            | No                    | No                | No                           | No              | Symptom Check List (SCL 90) depression scale               |
| Bond 2007 (4)   | 6 months           | 62  | Elderly<br>45% female<br>Mix                    | Community  | No                            | No                    | Yes               | Yes                          | Yes             | Centre for Epidemiological Studies Depression Scale (CESD) |

|                     |           |     |                                      |              |     |     |     |     |     |                                                            |
|---------------------|-----------|-----|--------------------------------------|--------------|-----|-----|-----|-----|-----|------------------------------------------------------------|
| DAFNE 2002 (5)      | 6 months  | 169 | 56% female<br>Type 1<br>Poor control | Specialist   | Yes | Yes | No  | No  | No  | Well being questionnaire (WBQ 12) total wellbeing score    |
| Davies 2008 (6)     | 8 months  | 824 | Elderly<br>45% female<br>Type 2      | Primary care | Yes | Yes | No  | Yes | No  | WHO WHOQOL-BREF psychological scale                        |
| De Wit 2008 (7)     | 12 months | 91  | Children<br>47% female<br>Type 1     | Specialist   | No  | No  | No  | Yes | Yes | Centre for Epidemiological Studies Depression Scale (CESD) |
| Didjurgeit 2002 (8) | 6 months  | 46  | 61% female<br>Type 1                 | Specialist   | No  | No  | Yes | Yes | Yes | Symptom Check List (SCL 90)                                |
| George 2008 (9)     | 6 months  | 114 | 55% female<br>Type 1                 | Specialist   | No  | Yes | No  | Yes | Yes | Short Form 36 mental health scale                          |
| Gilden 1992 (10)    | 24 months |     | Elderly<br>100% male<br>Mix          | Specialist   | No  | No  | No  | No  | Yes | Zung Depression Scale                                      |
| Glasgow 2006 (11)   | 2 months  | 400 | Elderly<br>50% female<br>Type 2      | Primary care | No  | No  | No  | Yes | No  | Patient Health Questionnaire (PHQ 9)                       |
| Graue 2005 (12)     | 15 months | 101 | Children<br>46% female<br>Type 1     | Specialist   | No  | No  | No  | No  | Yes | Child Health Questionnaire (CHQ-CF8) mental health scale   |

|                             |                   |     |                                                 |              |     |     |     |     |     |                                                                                              |
|-----------------------------|-------------------|-----|-------------------------------------------------|--------------|-----|-----|-----|-----|-----|----------------------------------------------------------------------------------------------|
| Grey 1998 (13)              | 6 months          | 77  | Children<br>57% female<br>Type 1                | Specialist   | No  | No  | Yes | No  | Yes | Children's<br>Depression<br>Inventory (CDI)                                                  |
| Henry 1997 (14)             | Post<br>treatment | 21  | Elderly<br>53% female<br>Type 2<br>Poor control | Specialist   | No  | No  | No  | No  | Yes | Beck Depression<br>Inventory (BDI)                                                           |
| Huang 2002 (15)             | 3 months          | 59  | Type 2                                          | Unclear      | No  | No  | No  | No  | Yes | Zung Depression<br>Scale                                                                     |
| Ismail 2008<br>MET (16)     | 12 months         | 238 | 60% female<br>Type 1<br>Poor control            | Specialist   | Yes | Yes | Yes | No  | No  | Patient Health<br>Questionnaire (PHQ<br>9)                                                   |
| Ismail 2008<br>MET+CBT (16) | 12 months         | 227 | 60% female<br>Type 1<br>Poor control            | Specialist   | Yes | Yes | Yes | No  | No  | Patient Health<br>Questionnaire (PHQ<br>9)                                                   |
| Jacobi 2002<br>mastery (17) | 18 weeks          | 26  | Elderly<br>49% female<br>Mix                    | Specialist   | No  | No  | No  | No  | No  | Personality<br>Assessment<br>Inventory (PAI) -<br>depression scale                           |
| Jacobi 2002<br>support (17) | 18 weeks          | 24  | Elderly<br>49% female<br>Mix                    | Specialist   | No  | No  | No  | No  | No  | Personality<br>Assessment<br>Inventory (PAI) -<br>depression scale                           |
| Janssen 2009<br>(18)        | 12 months         | 498 | Elderly<br>46% female<br>Type 2                 | Primary Care | No  | No  | Yes | Yes | Yes | Short Form 36<br>mental health scale                                                         |
| Karlsen 2004<br>(19)        | 6 months          | 92  | 48% female<br>Mix                               | Community    | No  | No  | No  | No  | No  | Psychological well<br>being (combined<br>Zung, Hopkins<br>Symptom Check<br>List and WHO-Ten) |

|                                             |           |     |                                 |                            |     |     |     |     |     |                                    |
|---------------------------------------------|-----------|-----|---------------------------------|----------------------------|-----|-----|-----|-----|-----|------------------------------------|
| Katon 2006 (20,21)                          | 24 months | 329 | Elderly<br>65% female<br>Type 2 | Primary care               | No  | No  | Yes | Yes | Yes | Depression free days               |
| Koehler 1981 progressive relaxation (22)    | 4 weeks   | 17  | 71% female<br>Type 1            | Community                  | No  | No  | No  | No  | Yes | IPAT anxiety scale                 |
| Koehler 1981 self-relaxation (22)           | 4 weeks   | 17  | 71% female<br>Type 1            | Community                  | No  | No  | No  | No  | Yes | IPAT anxiety scale                 |
| Kulzer 2007 self management group (23)      | 3 months  | 127 | Elderly<br>50% female<br>Type 2 | Community                  | Yes | Yes | Yes | Yes | Yes | Psychological Strain Questionnaire |
| Kulzer 2007 self management individual (23) | 3 months  | 130 | Elderly<br>50% female<br>Type 2 | Community                  | Yes | Yes | Yes | Yes | Yes | Psychological Strain Questionnaire |
| Lambers 2008 combination (24)               | 3 months  | 35  | Elderly<br>37% female<br>Type 2 | Specialist<br>Primary care | No  | No  | Yes | Yes | Yes | Short Form 36 mental health scale  |
| Lambers 2008 exercise (24)                  | 3 months  | 35  | Elderly<br>37% female<br>Type 2 | Specialist<br>Primary care | No  | No  | Yes | Yes | Yes | Short Form 36 mental health scale  |
| Ligtenberg 1998 (25)                        | 6 weeks   | 58  | Elderly<br>66% female<br>Type 2 | Primary care               | No  | No  | No  | No  | Yes | Bradley Well Being Questionnaire   |
| Litaker 2003 (26)                           | 12 months | 157 | Elderly<br>58% female<br>Type 2 | Primary care               | No  | No  | No  | No  | Yes | Short Form 36 mental health scale  |



|                     |                |     |                                                 |              |     |     |     |     |     |                                                            |
|---------------------|----------------|-----|-------------------------------------------------|--------------|-----|-----|-----|-----|-----|------------------------------------------------------------|
| Lustman 1998 (27)   | 6 months       | 51  | Elderly<br>60% female<br>Type 2<br>Poor control | Primary care | Yes | Yes | Yes | Yes | Yes | Beck Depression Inventory (BDI)                            |
| Ma 2006 (28)        | Post treatment | 67  | 43% female<br>Type 2                            | Unclear      | No  | No  | No  | No  | Yes | Self-rating depression scale (SDS)                         |
| Maljanian 2005 (29) | 3 months       | 507 | Elderly<br>53% female<br>Type 2                 | Specialist   | No  | No  | No  | No  | No  | Centre for Epidemiological Studies Depression Scale (CESD) |
| McGinnis 2005 (30)  | 4 weeks        | 39  | Elderly<br>76% female<br>Type 2                 | Community    | No  | No  | No  | No  | No  | Beck Depression Inventory (BDI)                            |
| McGrady 1999 (31)   | 1 month        | 18  | 44% female<br>Type 1                            | Community    | No  | No  | No  | No  | Yes | Zung Depression Scale                                      |
| O'Kane 2008 (32)    | 12 months      | 184 | Elderly<br>40% female<br>Type 2                 | Specialist   | Yes | Yes | Yes | Yes | Yes | Well Being Questionnaire (WBQ-22) total wellbeing scale    |
| Piette 2000 (33)    | 12 months      | 280 | Elderly<br>59% female<br>Mix                    | Primary care | Yes | Yes | No  | Yes | Yes | Centre for Epidemiological Studies Depression Scale (CESD) |
| Pouwer 2001 (34)    | 12 months      | 400 | Elderly<br>53% female<br>Mix                    | Specialist   | Yes | No  | No  | Yes | Yes | Short Form 36 mental health scale                          |

|                     |          |     |                                                 |                            |     |     |     |     |     |                                                            |
|---------------------|----------|-----|-------------------------------------------------|----------------------------|-----|-----|-----|-----|-----|------------------------------------------------------------|
| Robertson 2002 (35) | 60 days  | 71  | Elderly<br>55% female<br>Type 2<br>Poor control | Unclear                    | Yes | No  | No  | No  | Yes | Well Being Questionnaire (WBQ-22) total wellbeing scale    |
| Rosal 2005 (36)     | 6 months | 25  | Elderly<br>80% female<br>Type 2                 | Community                  | No  | No  | No  | No  | Yes | Centre for Epidemiological Studies Depression Scale (CESD) |
| Rost 1991 (37)      | 4 months | 61  | 60% female<br>Mix<br>Poor control               | Community<br>Specialist    | No  | No  | No  | No  | Yes | Functional status questionnaire psychological functioning  |
| Scott 1984 (38)     | 4 weeks  | 85  | Type 2                                          | Specialist                 | Yes | No  | No  | No  | No  | Speilberger self evaluation questionnaire for depression   |
| Siebolds 2006 (39)  | 6 months | 250 | Elderly<br>48% female<br>Type 2                 | Primary care<br>Specialist | No  | No  | No  | No  | Yes | Well Being Questionnaire (WBQ-22) depression scale         |
| Speiss 1995 (40)    | 9 months | 23  | 39% female<br>Type 1                            | Specialist                 | No  | Yes | Yes | No  | Yes | Beck Depression Inventory (BDI)                            |
| Sykes 2004 (41)     | 3 months | 36  | Elderly<br>69% female<br>Type 2                 | Specialist                 | No  | No  | No  | No  | Yes | Short Form 36 mental health scale                          |
| Toobert 2007 (42)   | 6 months | 279 | Elderly<br>100% female<br>Type 2                | Specialist                 | No  | No  | No  | Yes | Yes | Medical Outcomes Study (MOS 12) mental health              |

|                          |           |     |                                                |              |     |    |    |     |     |                                                                     |
|--------------------------|-----------|-----|------------------------------------------------|--------------|-----|----|----|-----|-----|---------------------------------------------------------------------|
| van der Ven<br>2005 (43) | 3 months  | 107 | 59% female<br>Type 1<br>Poor control           | Specialist   | Yes | No | No | Yes | No  | Centre for<br>Epidemiological<br>Studies Depression<br>Scale (CESD) |
| Wagner 2001<br>(44)      | 24 months | 707 | Elderly<br>47% female<br>Mix                   | Primary care | No  | No | No | Yes | Yes | Centre for<br>Epidemiological<br>Studies Depression<br>Scale (CESD) |
| Weinburger<br>1995 (45)  | 12 months | 275 | Elderly<br>1% female<br>Type 2<br>Poor control | Primary care | No  | No | No | No  | Yes | Short Form 36<br>mental health scale                                |

## Online Appendix Figure 2 Meta analysis of HbA1c outcomes

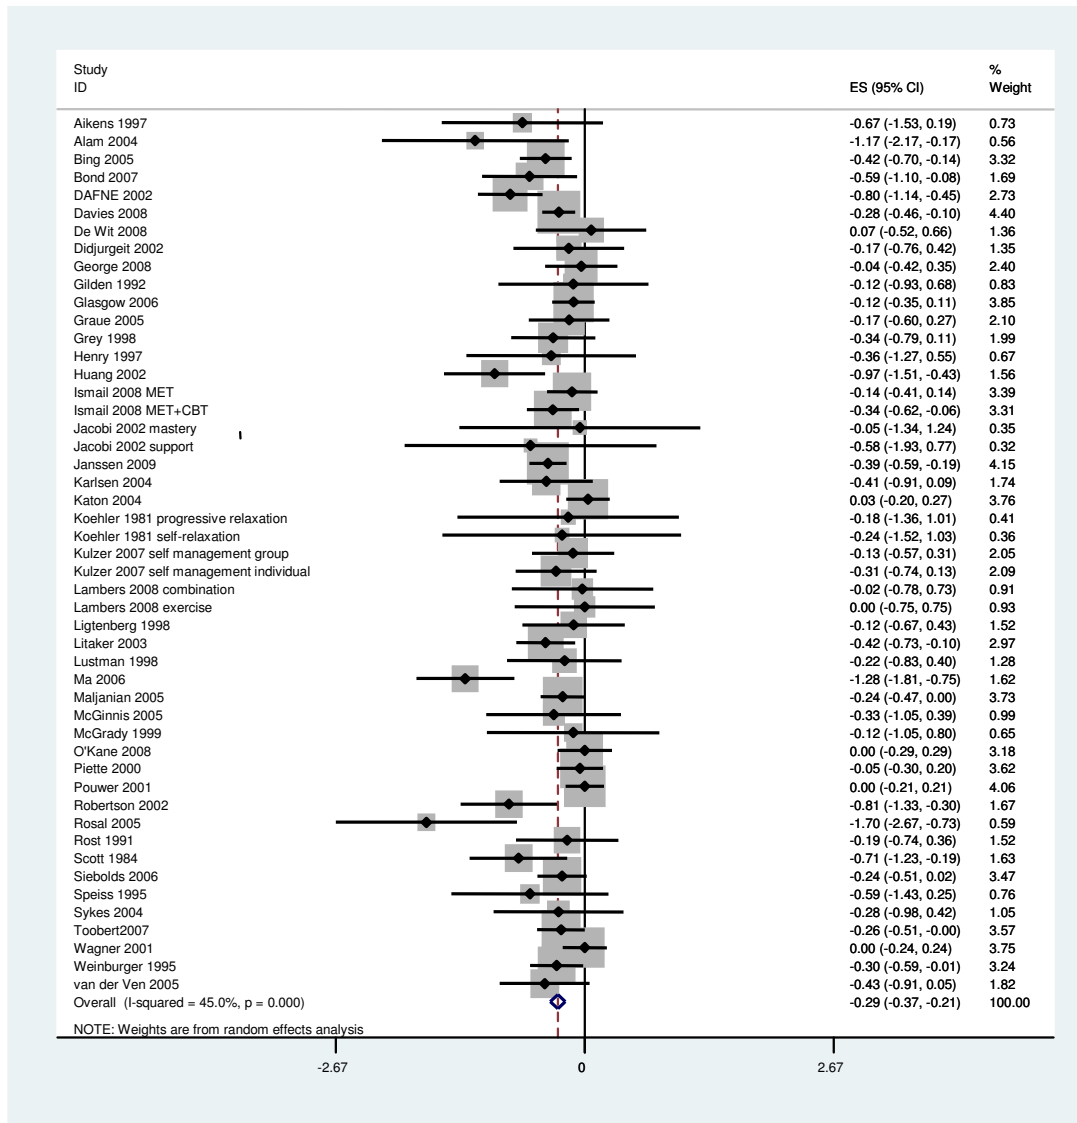

## Online Appendix Figure 3 Meta analysis of mental health outcomes

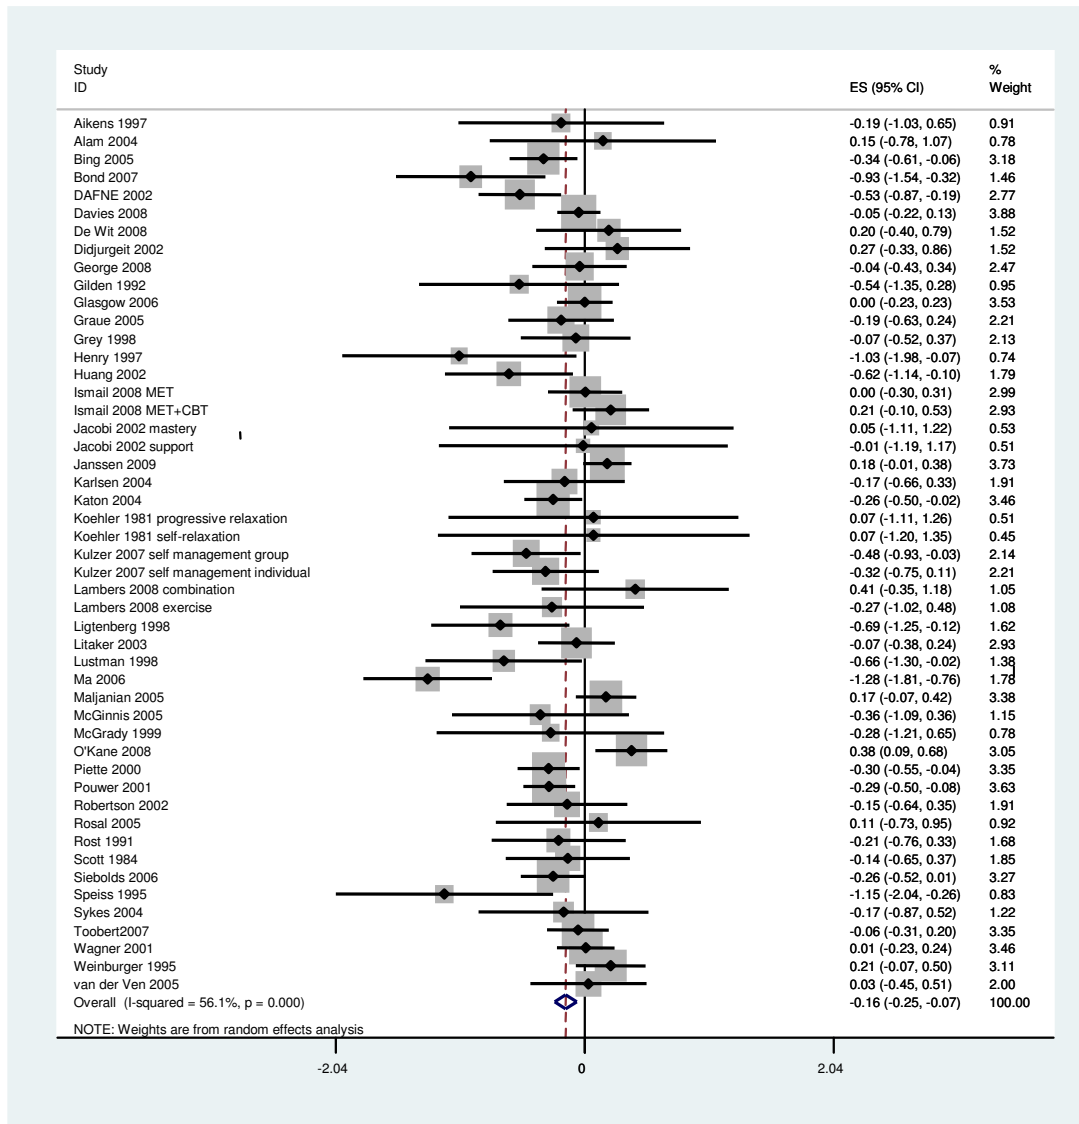

**Online Appendix Figure 4 Funnel plot of effect size versus standard error for HbA1c outcomes**

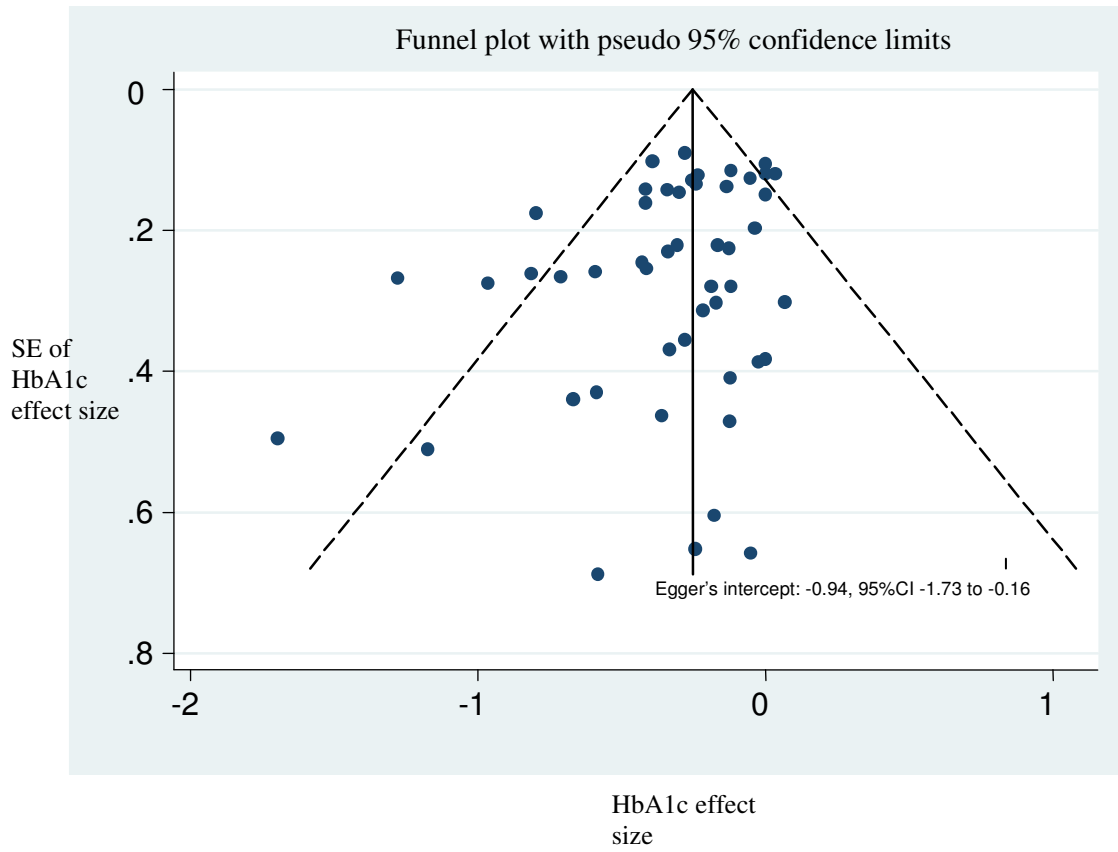

**Online Appendix Figure 5** Funnel plot of effect size versus standard error for mental health outcomes

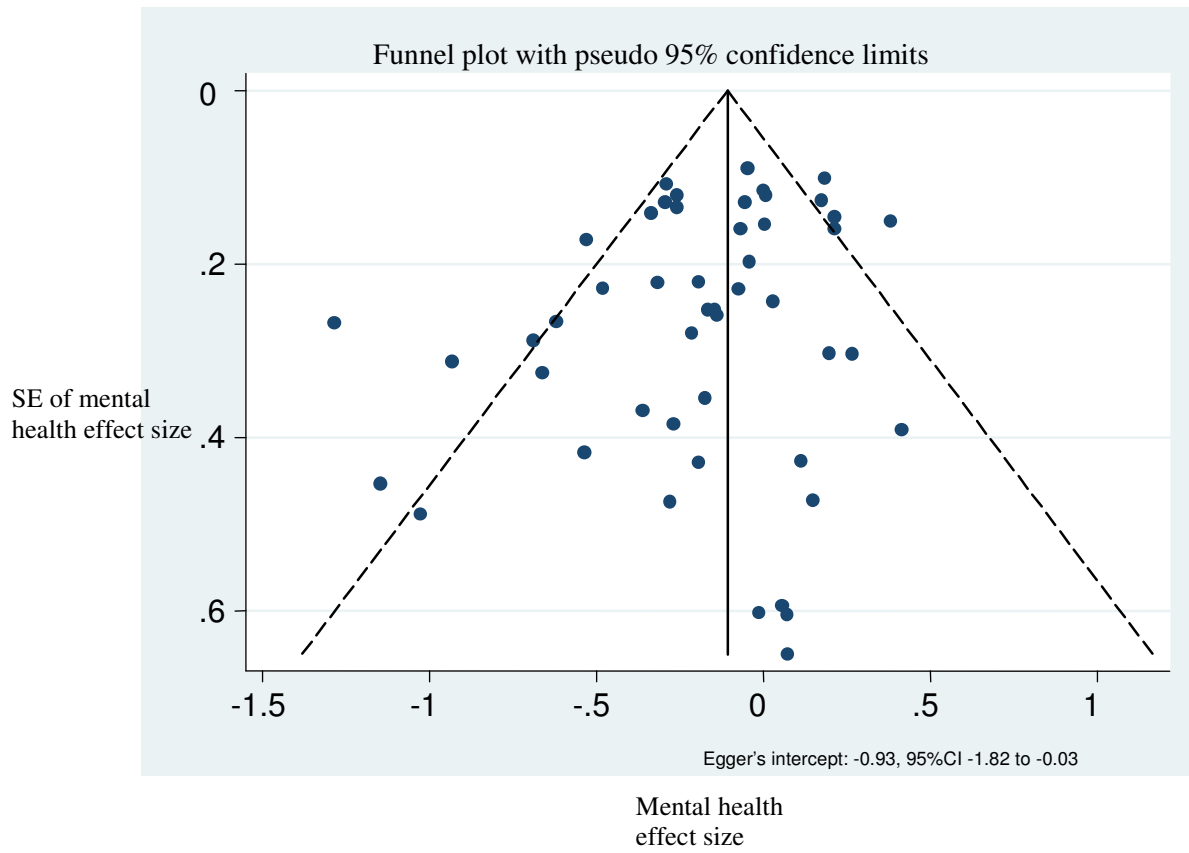

## Reference List

1. Aikens J, Kiolbasa T, Sobel R: Psychological predictors of glycemic change with relaxation training in non-insulin-dependent diabetes mellitus. *Psychother Psychosom* 66:302-306, 1997
2. Alam S, Stolinski M, Pentecost C, Boroujerdi M, Jones R, Sonksen P, Umpleby A: The effect of a six-month exercise program on very low-density lipoprotein apolipoprotein B secretion in type 2 diabetes. *J Clin Endocrinol Metab* 89:688-694, 2004
3. Bing S, Bo B, Hai-ling S: Effects of Diabetes Education and Psychological Intervention on Comprehensive Treatment of Type 2 Diabetes. *Chinese J Clin Psychol* 13:483-485, 2005
4. Bond G, Burr R, Wolf F, Price M, McCurry S, Teri L: The effects of a web-based intervention on the physical outcomes associated with diabetes among adults age 60 and older: a randomized trial. *Diabet Technol Therapeutics* 9:52-59, 2007
5. DAFNE Study Group: Training in flexible, intensive insulin management to enable dietary freedom in people with type 1 diabetes: dose adjustment for normal eating (DAFNE) randomised controlled trial. *BMJ* 325:746-751, 2002
6. Davies M, Heller S, Skinner T, Campbell M, Carey M, Cradock S, Dallosso H, Daly H, Doherty Y, Eaton S, Fox C, Oliver L, Rantell K, Rayman G, Khunti K, Diabetes Education and Self Management for Ongoing and Newly Diagnosed Collaborative: Effectiveness of the diabetes education and self management for ongoing and newly diagnosed (DESMOND) programme for people with newly diagnosed type 2 diabetes: cluster randomised controlled trial. *BMJ* 336:491-495, 2008
7. De Wit M, Delemarre-Van Der Waal H, Bokma J, Haasnoot K, Houdijk M, Gemke R, Snoek F: Monitoring and discussing health-related quality of life in adolescents with type 1 diabetes improves psychosocial well being. *Diabet Care* 31:1521-1526, 2008
8. Didjurgeit U, Kruse J, Schmitz N, Stückenschneider P, Sawicki P: A time-limited, problem-orientated psychotherapeutic intervention in Type 1 diabetic patients with complications: a randomized controlled trial. *Diabet Med* 19:814-821, 2002
9. George J, Valdovinos A, Russell I, Dromgoole P, Lomax S, Torgerson D, Wells T, Thow J: Clinical effectiveness of a brief educational intervention in Type 1 diabetes: results from the BITES (Brief Intervention in Type 1 diabetes, Education for Self-efficacy) trial. *Diabet Med* 25:1447-1453, 2008
10. Gildea J, Hendryx M, Clar S, Casia C, Singh S: Diabetes support groups improve health care of older diabetic patients. *J Am Geriatr Soc* 40:147-150, 1992
11. Glasgow R, Nutting P, Toobert D, King D, Strycker L, Jex M, O'Neill C, Whitesides H, Merenich J: Effects of a brief computer-assisted diabetes self-management intervention on dietary, biological and quality-of-life outcomes. *Chronic Illness* 2:27-38, 2006
12. Graue M, Wentzel-Larsen T, Hanestad BR, Søvik O: Evaluation of a programme of group visits and computer-assisted consultations in the treatment of adolescents with Type 1 diabetes. *Diabet Med* 22:1522-1529, 2005
13. Grey M, Boland E, Davidson M, Yu C, Sullivan-Bolyai S, Tamborlane W: Short-term effects of coping skills training as adjunct to intensive therapy in adolescents. *Diabet Care* 21:902-908, 1998



14. Henry J, Wilson P, Bruce D, Chisholm D, Rawling P: Cognitive-behavioural stress management for patients with non-insulin dependent diabetes mellitus. *Psychol Health Med* 2:109-118, 1997
15. Huang X, Song L, Li T, Li J, Li N, Wu S: Effect of health education and psychosocial intervention on depression in patients with type II diabetes. *Chinese Ment Health J* 16:149-151, 2002
16. Ismail K, Thomas S, Maissi E, Chalder T, Schmidt U, Bartlett J, Patel A, Dickens C, Creed F, Treasure J: Motivational enhancement therapy with and without cognitive behaviour therapy to treat type 1 diabetes. *Ann Intern Med* 149:708-719, 2008
17. Jacobi, S. Effects of psychological differentiation on success with self management of diabetes. 2002. Unpublished PhD thesis, Columbia University.
18. Janssen P, Gorter K, Stolk R, Rutten G: Randomised controlled trial of intensive multifactorial treatment for cardiovascular risk in patients with screen-detected type 2 diabetes: 1-year data from the ADDITION Netherlands study. *Br J Gen Pract* 59:43-48, 2009
19. Karlsen B, Idsoe T, Dirdal I, Rokne HB, Bru E: Effects of a group-based counselling programme on diabetes-related stress, coping, psychological well-being and metabolic control in adults with type 1 or type 2 diabetes. *Pat Educ Couns* 53:299-308, 2004
20. Simon G, Katon W, Lin E, Rutter C, Manning W, Von Korff M, Ciechanowski P, Ludman E, Young B: Cost effectiveness of systematic depression treatment among people with diabetes mellitus. *Arch Gen Psychiatry* 64:65-72, 2007
21. Katon W, Von Korff M, Lin E, Simon G, Ludman E, Russo J, Walker E, Bush T: The Pathways study: a randomized trial of collaborative care in patients with diabetes and depression. *Arch Gen Psychiatry* 61:1042-1049, 2004
22. Koehler, B. The effects of relaxation on psychological and physical measure in diabetes mellitus. 1981. New York, Unpublished PhD thesis, St John's University.
23. Kulzer B, Hermanns N, Reinecker H, Haak T: Effects of self-management training in Type 2 diabetes: A randomized, prospective trial. *Diabet Med* 24:415-423, 2007
24. Lambers S, Van Laethem C, Van Acker K, Calders P: Influence of combined exercise training on indices of obesity, diabetes and cardiovascular risk in type 2 diabetes patients. *Clin Rehab* 22:483-492, 2008
25. Ligtenberg P, Godaert G, Hillenaar E, Hoekstra J: Influence of a physical training program on psychological well-being in elderly type 2 diabetes patients. Psychological well-being, physical training, and type 2 diabetes. *Diabet Care* 21:2196-2197, 1998
26. Litaker D, Mion L, Planavsky L, Kippes C, Mehta N, Frolkis J: Physician - nurse practitioner teams in chronic disease management: the impact on costs, clinical effectiveness, and patients' perception of care. *J Interproff Care* 17:223-237, 2003
27. Lustman P, Griffith L, Freedland K, Kissel S, Clouse R: Cognitive behavior therapy for depression in type 2 diabetes mellitus. A randomized, controlled trial. *Ann Intern Med* 129:613-621, 1998
28. Ma Z, Li M, Chuan-sheng W: Effects of comprehensive psycho-intervention on life quality and carbohydrate metabolism in patients with type 2 diabetes mellitus. *Chinese J Clin Rehab* 10:15-17, 2006
29. Maljanian R, Grey N, Staff I, Conroy L: Intensive telephone follow-up to a hospital-based disease management model for patients with diabetes mellitus. *Dis Manag* 8:15-25, 2005

30. McGinnis R, McGrady A, Cox S, Grower-Dowling K: Biofeedback-assisted relaxation in type 2 diabetes. *Diabet Care* 28:2145-2149, 2005
31. McGrady A, Horner J: Role of mood in outcome of biofeedback assisted relaxation therapy in insulin dependent diabetes mellitus. *Appl Physiol Biofeedback* 24:79-88, 1999
32. O'Kane M, Bunting B, Copeland M, Coates V, ESMON study group: Efficacy of self monitoring of blood glucose in patients with newly diagnosed type 2 diabetes (ESMON study): randomised controlled trial. *BMJ* 336:1177, 2008
33. Piette J, Weinberger M, McPhee S: The effect of automated calls with telephone nurse follow-up on patient-centered outcomes of diabetes care: a randomized, controlled trial. *Med Care* 38:218-230, 2000
34. Pouwer F, Snoek F, van der Ploeg H, Adèr H, Heine R: Monitoring of psychological well-being in outpatients with diabetes: effects on mood, HbA(1c), and the patient's evaluation of the quality of diabetes care: a randomized controlled trial. *Diabet Care* 24:1929-1935, 2001
35. Robertson, J. Evaluation of an andragogical intervention on the self-care behaviors of adults with non-insulin dependent diabetes mellitus. 2004. Unpublished PhD thesis, University of Arkansas.
36. Rosal M, Olendzki B, Reed G, Gumieniak O, Scavron J, Ockene I: Diabetes self-management among low-income Spanish-speaking patients: a pilot study. *Ann Behav Med* 29:225-235, 2005
37. Rost K, Flavin K, Cole K, McGill J: Change in metabolic control and functional status after hospitalization. Impact of patient activation intervention in diabetic patients. *Diabet Care* 14:881-889, 1991
38. Scott R, Beaven D, Stafford J: The effectiveness of diabetes education for non-insulin-dependent diabetic persons. *Diabetes Educ* 10:36-39, 1984
39. Siebolds M, Gaedeke O, Schwedes U, SMBG Study Group: Self-monitoring of blood glucose--psychological aspects relevant to changes in HbA1c in type 2 diabetic patients treated with diet or diet plus oral antidiabetic medication. *Pat Educ Couns* 62:104-110, 2006
40. Spiess K, Sachs G, Pietschmann P, Prager R: A program to reduce onset distress in unselected type I diabetic patients: effects on psychological variables and metabolic control. *Eur J Endocrinol* 132:580-586, 1995
41. Sykes K, Yeung T, Ko G: A 12-week prospective randomized controlled trial to investigate the effects of aerobic training on type 2 diabetes patients. *Am J Recreation Ther* 3:36-42, 2004
42. Toobert D, Glasgow R, Strycker L, Barrera JM, Ritzwoller D, Weidner G: Long-term effects of the Mediterranean lifestyle program: A randomized clinical trial for postmenopausal women with type 2 diabetes. *Int J Beh Nutr Phys Activity* 4: 2007
43. van der Ven N, Hogenelst M, Tromp-Wever A, Twisk J, van der Ploeg H, Heine R, Snoek F: Short-term effects of cognitive behavioural group training (CBGT) in adult Type 1 diabetes patients in prolonged poor glycaemic control. A randomized controlled trial. *Diabet Med* 22:1619-1623, 2005
44. Wagner E, Grothaus L, Sandhu N, Galvin M, McGregor M, Artz K, Coleman E: Chronic care clinics for diabetes in primary care: a system-wide randomized trial. *Diabet Care* 24:695-700, 2001

45. Weinberger M, Kirkman M, Samsa G, Shortliffe E, Landsman P, Cowper P, Simel D, Feussner J: A nurse-coordinated intervention for primary care patients with non-insulin-dependent diabetes mellitus: impact on glycemic control and health-related quality of life. *J Gen Intern Med* 10:59-66, 1995
